# Supplementary material for: A high quality assembly of the Nile Tilapia (Oreochromis niloticus) genome reveals the structure of two sex determination regions
Source: PubMed Central journal article supplement (PMC5414186; doi:10.1186/s12864-017-3723-5), 2017-05-02

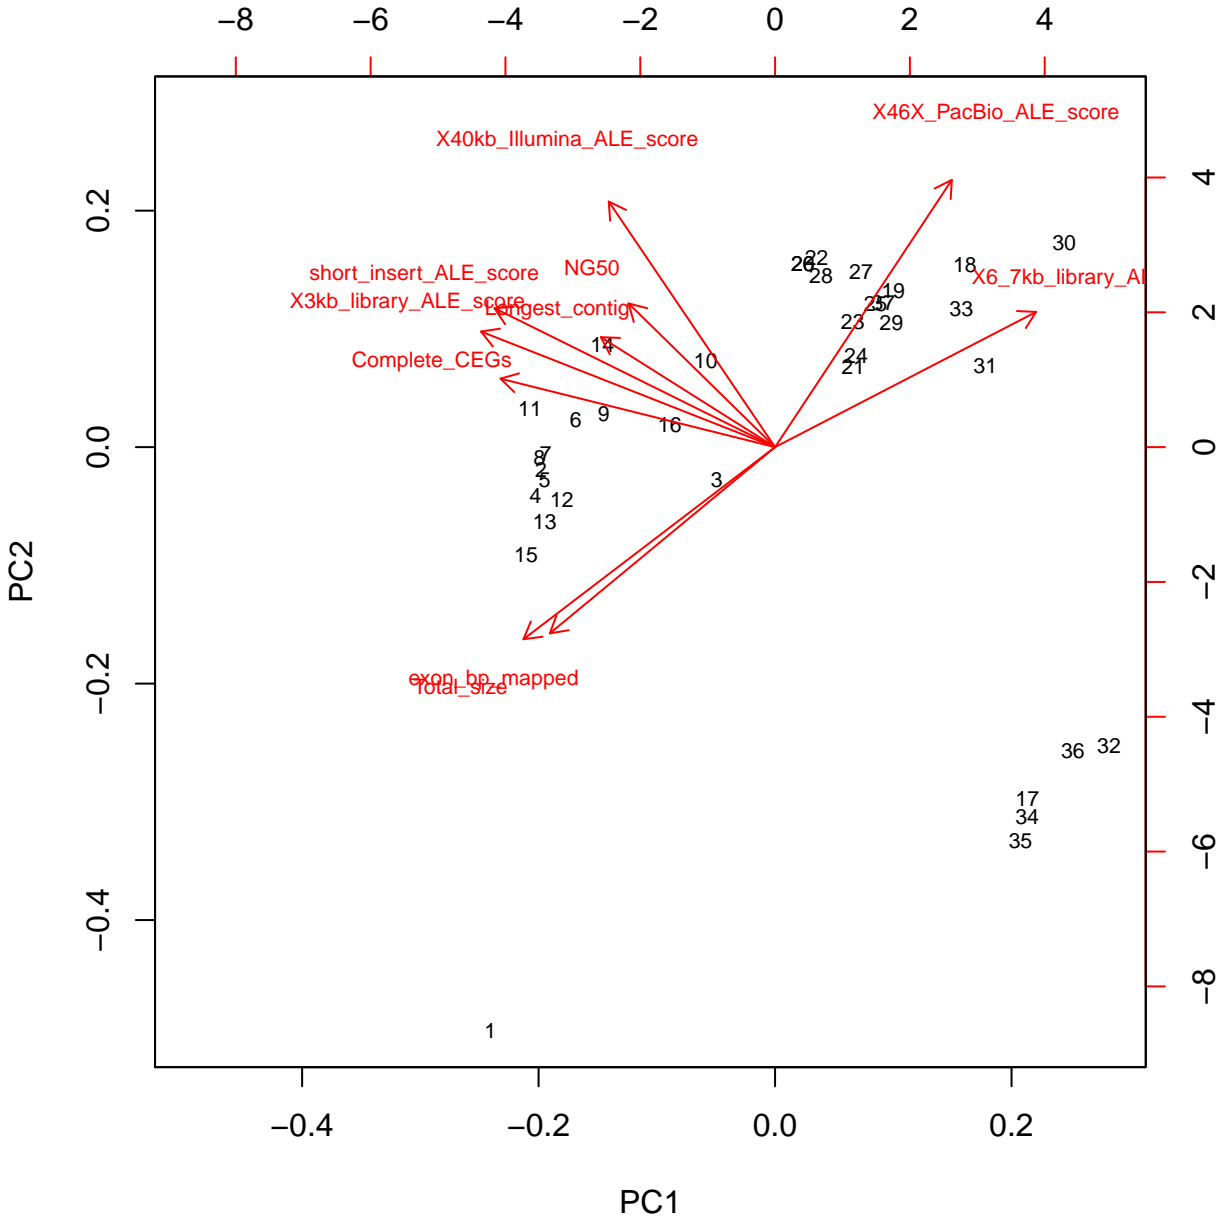

Supplement: 12864_2017_3723_MOESM2_ESM.pdf [file 12864_2017_3723_MOESM2_ESM.pdf]
